# Supplementary material for: Lack of interferon response in animals to naked siRNAs
Source: Springer Nature journal article supplement (doi:10.1038/nbt1038), 2004-11-21
Supplement: nbt1038-S5.pdf [file nbt1038-S5.pdf]

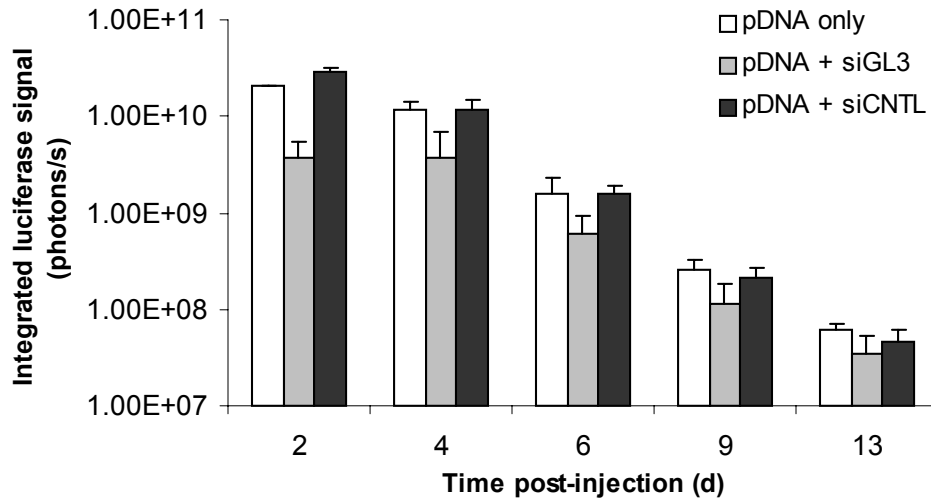

**Supplementary Figure 5 Synthetic siRNA accomplishes sequence-specific RNAi of an exogenous target in mice.** Female BALB/c mice were imaged over two weeks post-injection and total luciferase signals were integrated and quantified. The average of three or more replicate mice is presented and error bars represent one standard deviation. [This is the raw data that is presented in Figure 2b, presented here without further normalization.]
